# Supplementary material for: Nationwide Availability of and Enrollment in Medicare and Medicaid Dual-Eligible Special Needs Plans With Exclusively Aligned Enrollment
Source: PubMed Central journal article supplement (PMC11581671; doi:10.1001/jamahealthforum.2024.3546), 2024-10-18
Supplement: jamahealthforum-e243546-s002.pdf [file jamahealthforum-e243546-s002.pdf]

## Data Sharing Statement

Johnston. Nationwide Availability of and Enrollment in Medicare and Medicaid Dual-Eligible Special Needs Plans With Exclusively Aligned Enrollment. *JAMA Health Forum*. Published October 18, 2024. doi:10.1001/jamahealthforum.2024.3546

### Data

**Data available:** No

### Additional Information

**Explanation for why data not available:** This study used research identifiable patient data on the Medicare Chronic Condition Data Warehouse (CCW) that is only obtainable via execution of a data use agreement with the Centers for Medicare and Medicaid Services (CMS).
